# Supplementary material for: An atlas of regulatory elements in chicken: A resource for chicken genetics and genomics
Source: PubMed Central journal article supplement — Sci Adv. 2023 May 3;9(18):eade1204. doi: 10.1126/sciadv.ade1204 (PMC10156120; doi:10.1126/sciadv.ade1204), 2023-05-03
Supplement: sciadv.ade1204_sm.pdf [file sciadv.ade1204_sm.pdf]

## Supplementary Materials for

### **An atlas of regulatory elements in chicken: A resource for chicken genetics and genomics**

Zhangyuan Pan *et al.*

Corresponding author: Lingzhao Fang, [lingzhao.fang@qgg.au.dk](mailto:lingzhao.fang@qgg.au.dk); Huaijun Zhou, [hzhou@ucdavis.edu](mailto:hzhou@ucdavis.edu)

*Sci. Adv.* **9**, eade1204 (2023)  
DOI: 10.1126/sciadv.ade1204

**This PDF file includes:**

Figs. S1 to S16  
Legends for tables S1 to S12  
References

**Other Supplementary Material for this manuscript includes the following:**

Tables S1 to S12

## Supplementary Figures

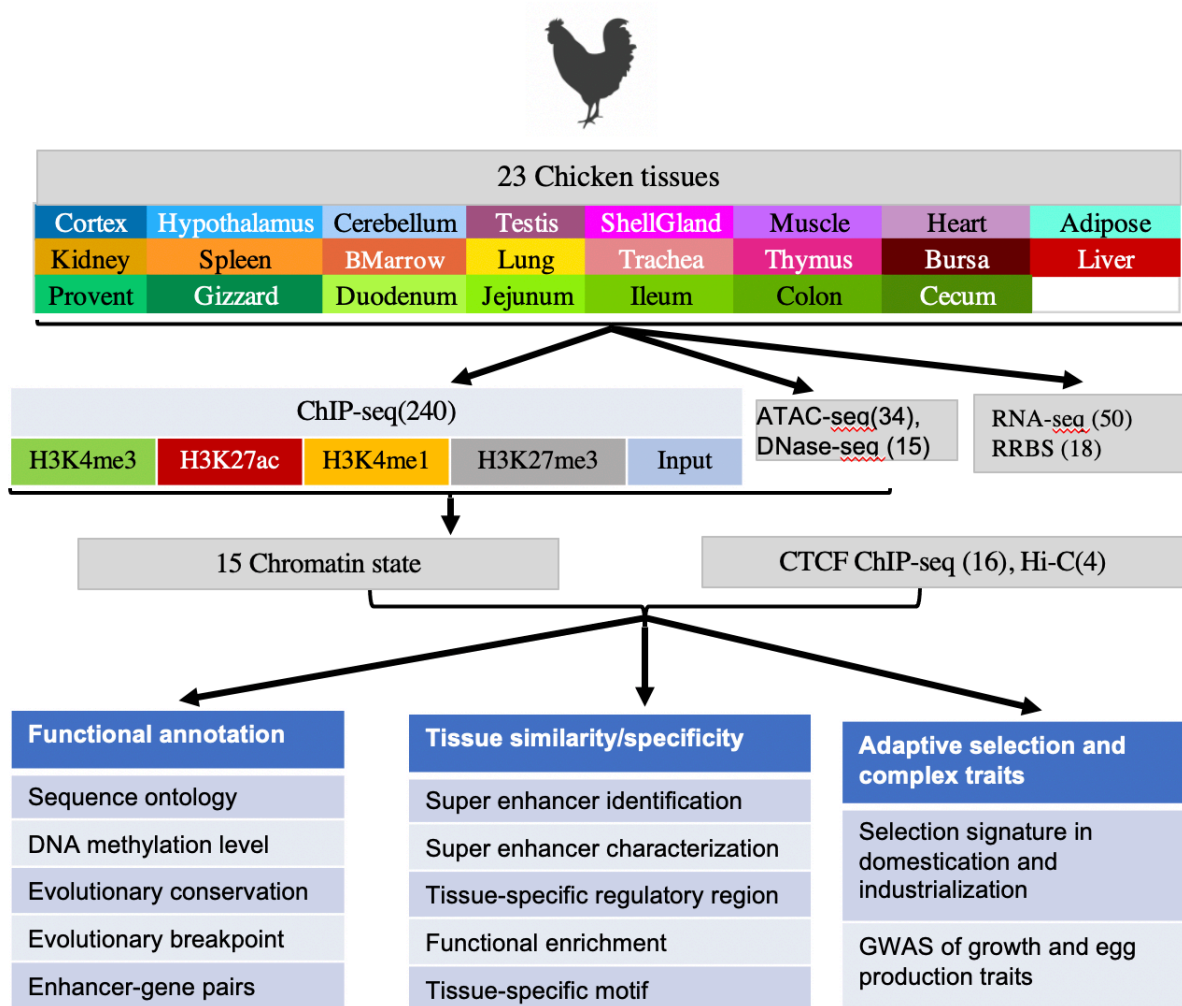

**Supplementary Fig. 1. The overview of the current study design.** This study collected and systematically integrated multi-omics data from 23 tissues in chickens, including ChIP-seq of histone modifications, ATAC-seq, DNase-seq, RNA-seq, RRBS, CTCF ChIP-seq, and Hi-C datasets. The numbers in the brackets are the number of samples for the corresponding assays.

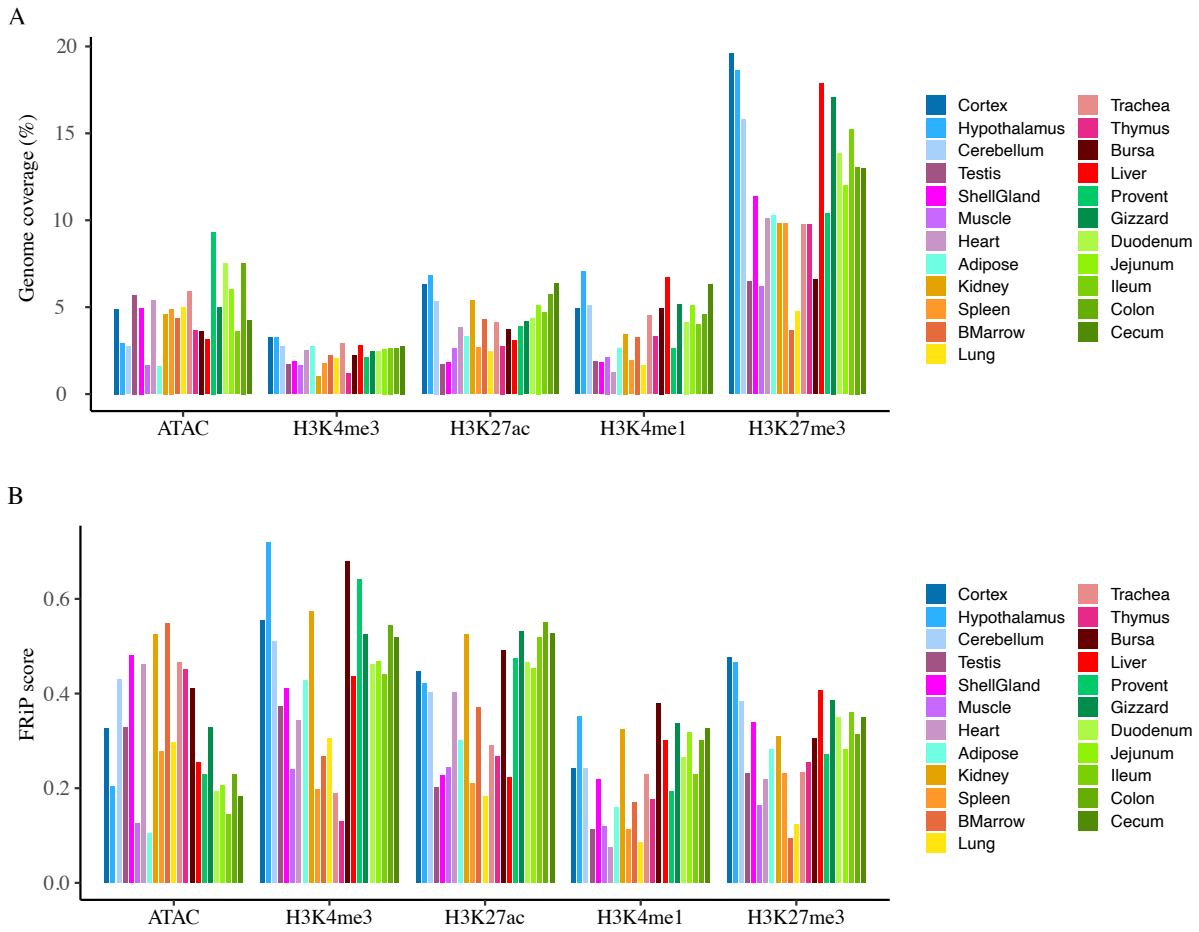

**Supplementary Fig. 2.** (A) The average genome coverage of peaks for each epigenetic marks in each tissue. (B) The average Fraction of Reads in Peaks (FRiP) for epigenetic marks across 23 tissues.

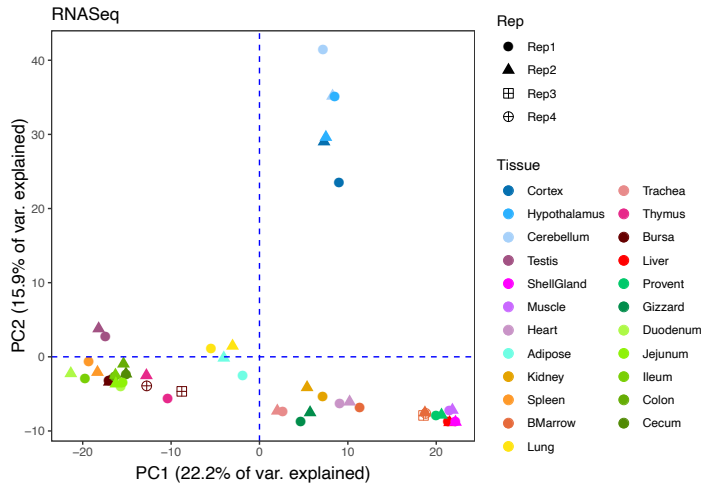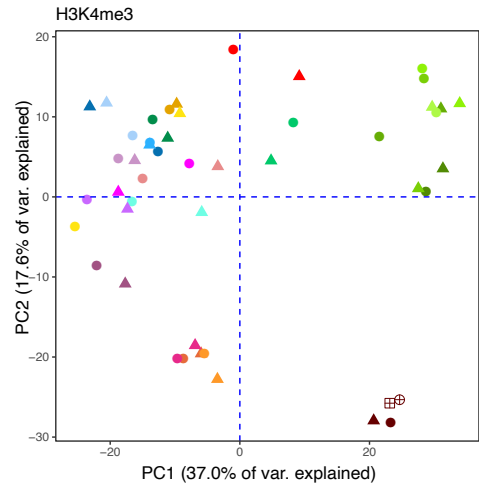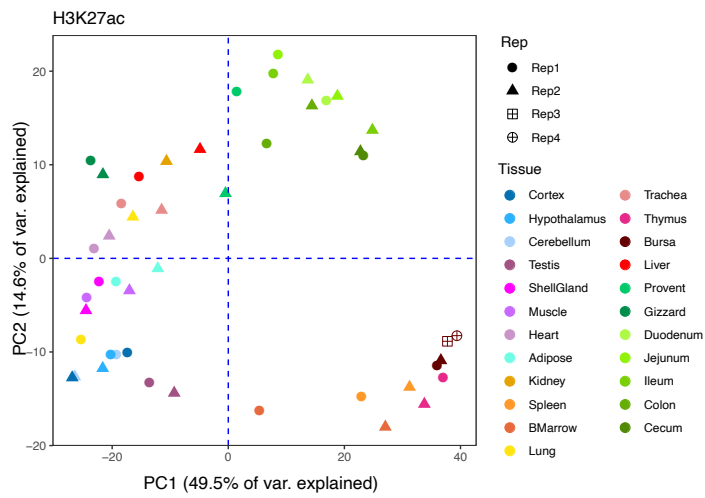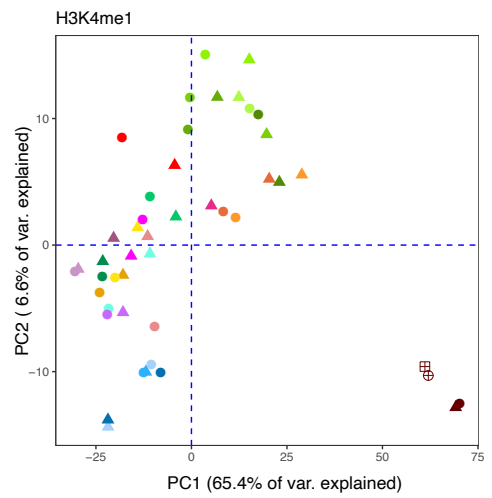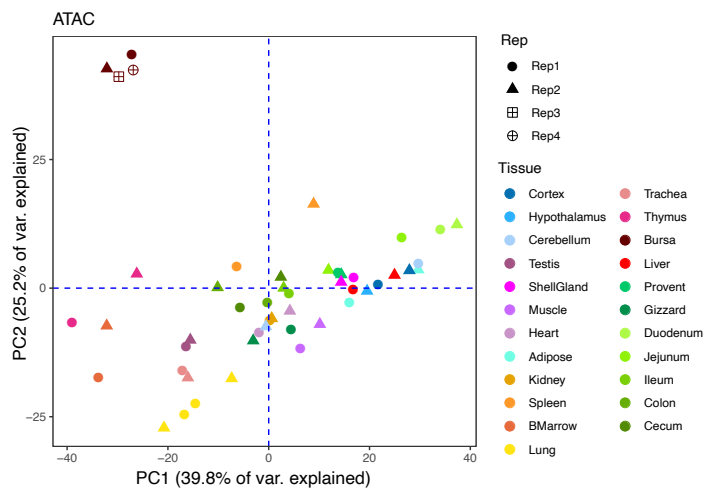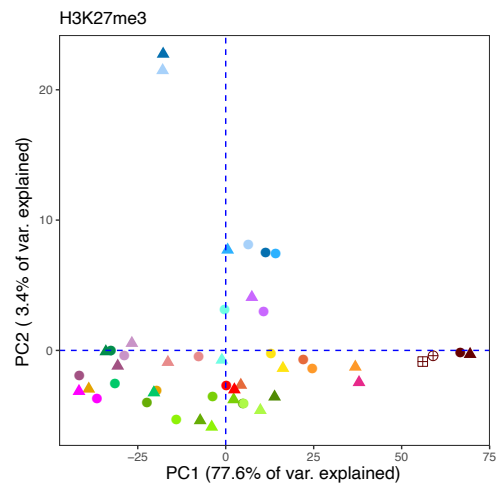

**Supplementary Fig. 3. The principal component analysis (PCA) of samples based on five epigenetic marks and RNA-seq data in 23 chicken tissues. The legends for color and shape are the same across all six plots.**

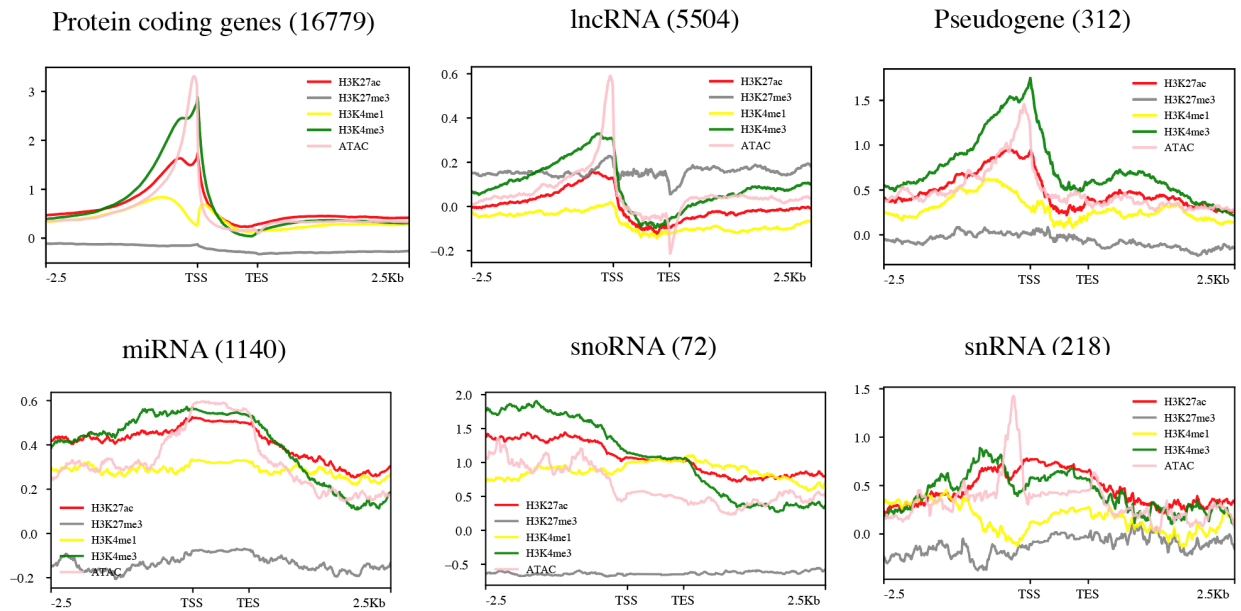

**Supplementary Fig. 4. The distribution of normalized signals (y-axis) of epigenetic marks around  $\pm 2.5$ Kb of six different gene types. These are including protein-coding genes, lncRNA, Pseudogene, miRNA, snoRNA and snRNA. TSS: transcription start site, TES: transcription end site. The numbers in the brackets are the number of corresponding genes.**

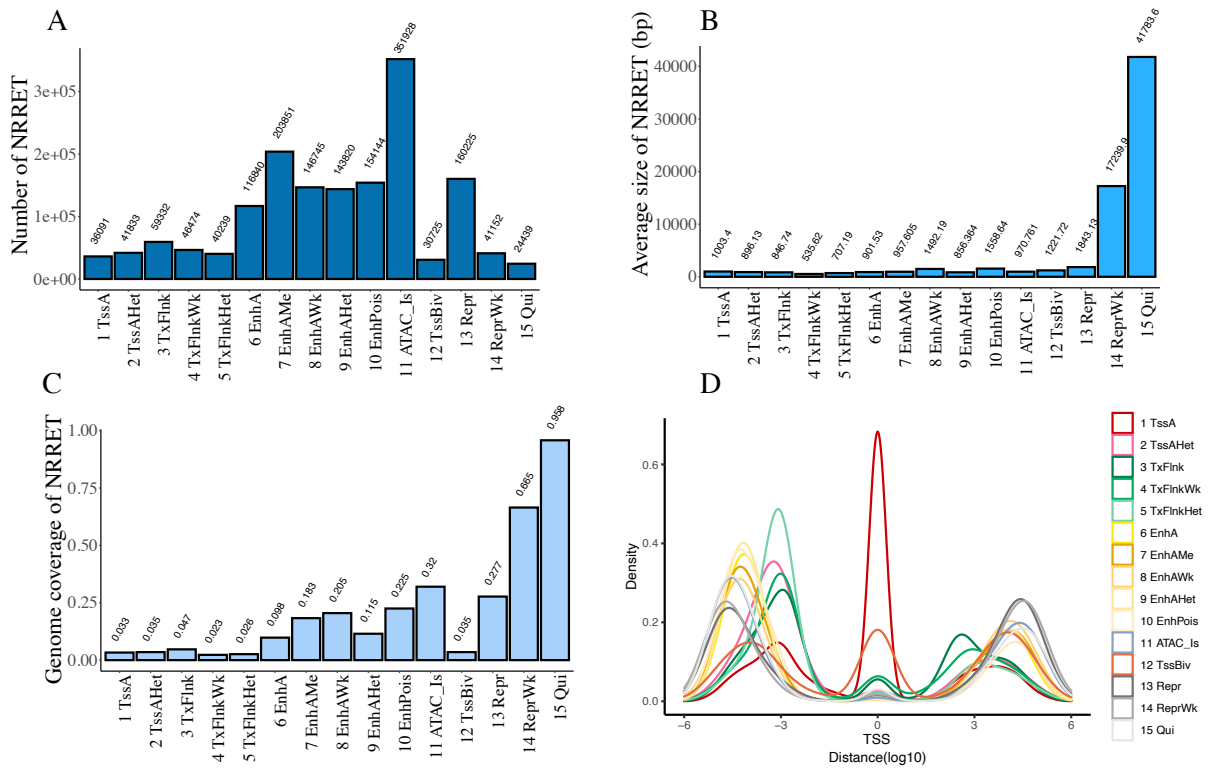

**E**

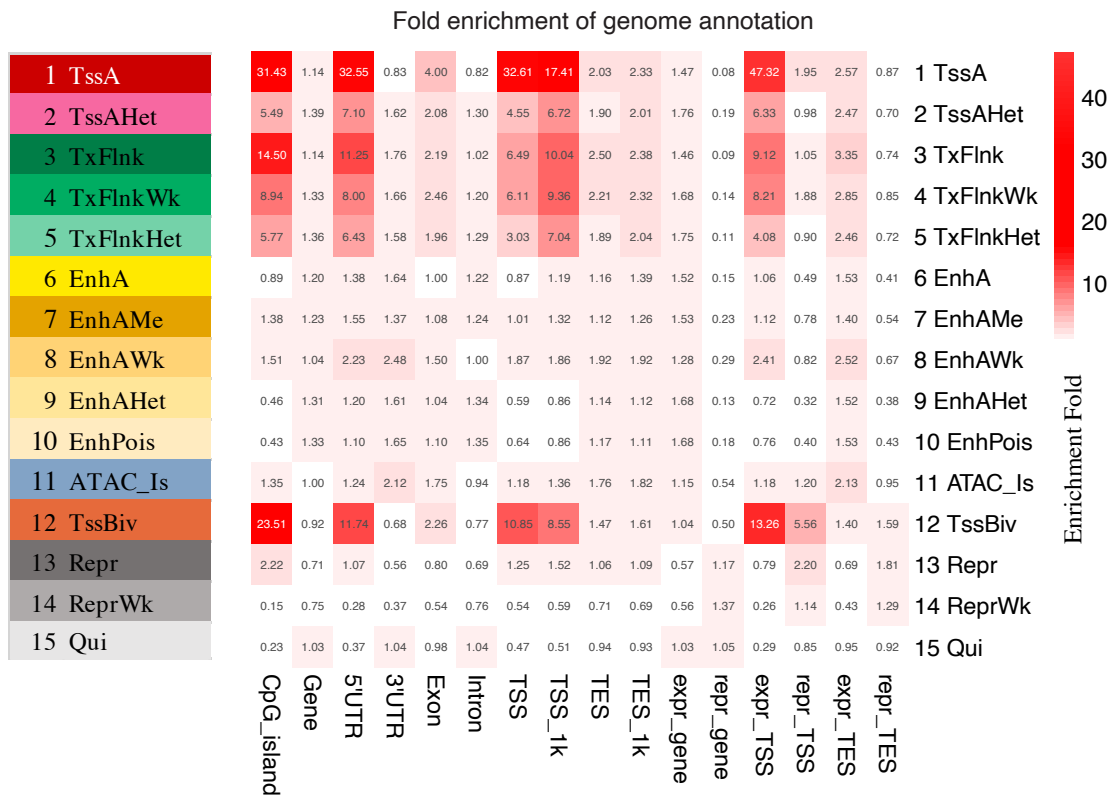

**Supplementary Fig. 5. General summary and characterization of chromatin states across 23 chicken tissues.** (A) The total number of non-redundant regulatory elements across all 23 tissues

(NRRET) for each chromatin state. (B) Average size of NRRET for each chromatin state. (C) Genome coverage (proportion, not percent) of NRRET in each chromatin state. (D) The distance of chromatin state to the TSS of the closest gene. (E). The average enrichment of chromatin states for genomic annotations across tissues, including CpG islands, genes, TSS/TES\_1K ( $\pm 1$  kb around TSS and TES), expressed genes (TPM  $\geq 0.1$ ), and repressed genes (TPM  $< 0.1$ ). TSS: transcription start site, TES: transcription end site.

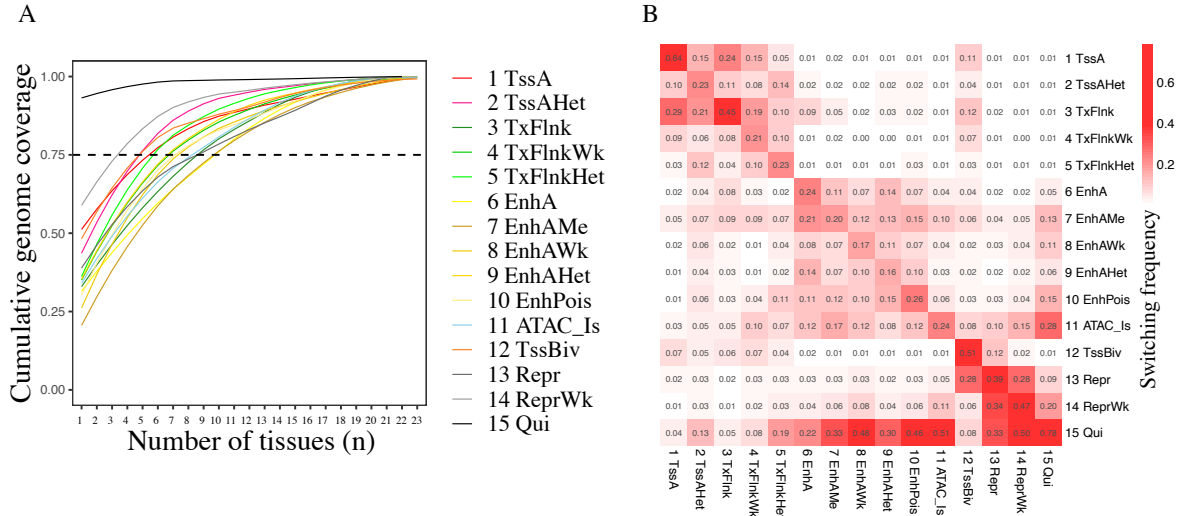

**Supplementary Fig. 6. Tissue-sharing patterns of chromatin states.** (A) The variability of chromatin states across 23 chicken tissues based on the cumulative fraction of genome coverage (proportion, not percent). Dashed line = 0.75. (B) The average switching patterns of chromatin states between tissues.

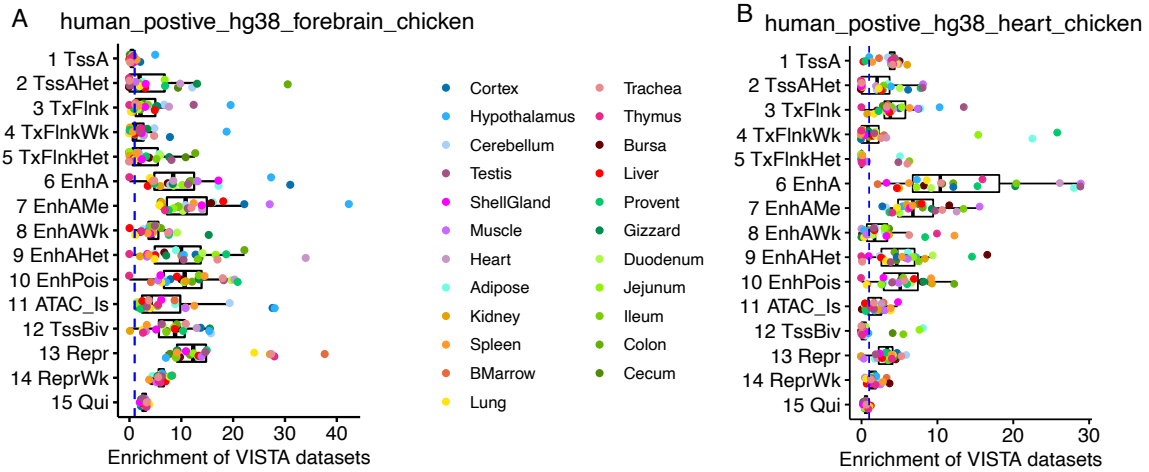

**Supplementary Fig. 7. The enrichment of VISTA enhancers in chicken chromatin states.** (A) The enrichment of human forebrain enhancers in chromatin states of 23 chicken tissues. The

VISTA forebrain specific enhancer had the highest enrichment at the enhancer (EnhA, EnhAMe) of brain tissues (Cortex, Hypothalamus, Cerebellum). (B) The enrichment of human heart enhancers in chromatin states of 23 chicken tissues. VISTA heart specific enhancers had the highest enrichment at the enhancer (EnhA, EnhAMe) of heart.

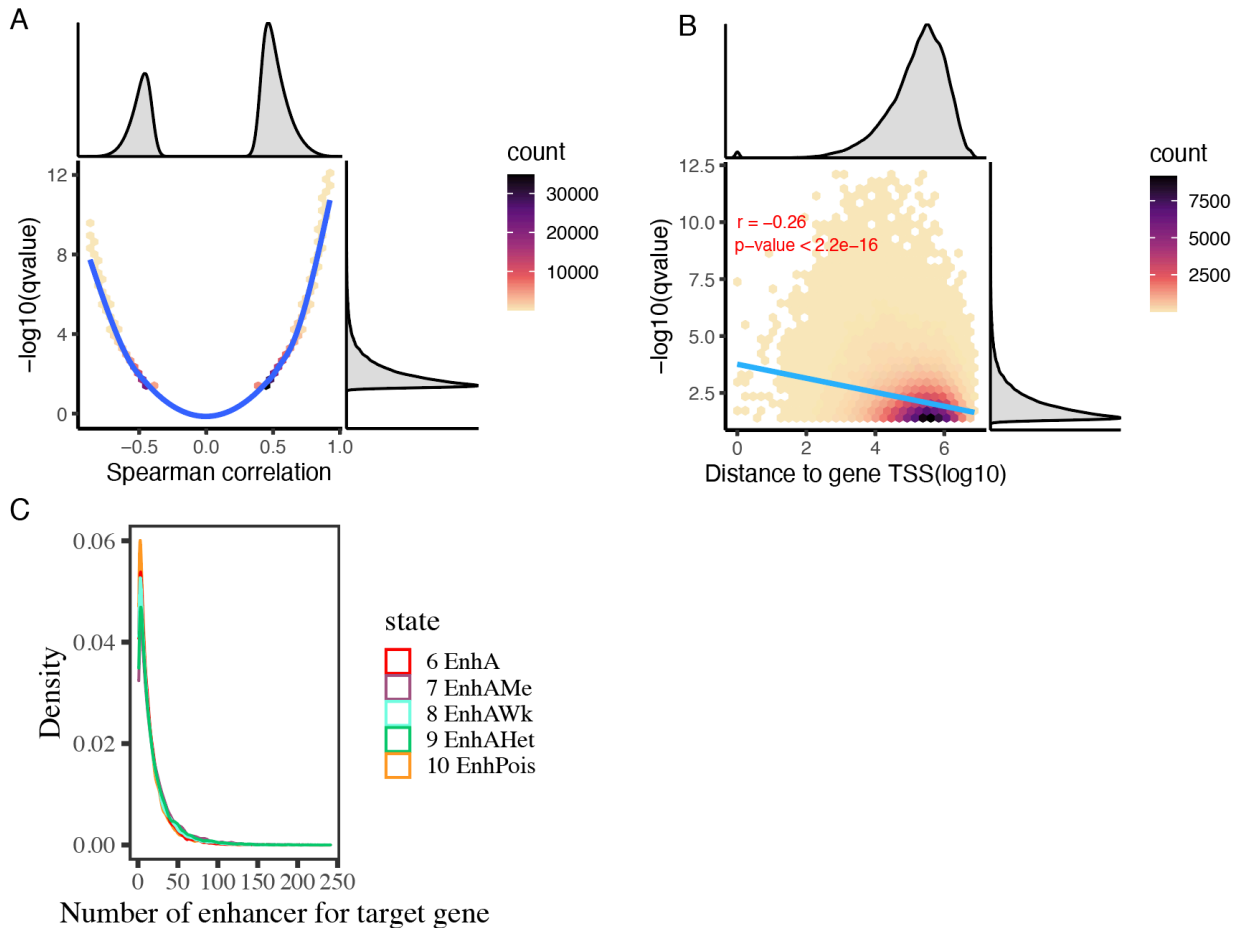

**Supplementary Fig. 8. General summary of enhancer-gene pairs.** (A) The relationship between Spearman correlations of H3K27ac signal and gene expression and the corresponding  $p$  values of enhancer-gene pairs. (B) The Spearman correlation between the distance of enhancers to their target genes and the confident  $p$  values of the enhancer-gene pairs. (C) The distribution of number of enhancers for target gene.



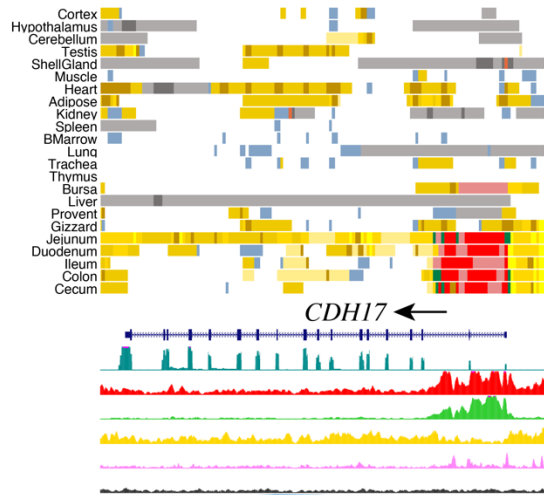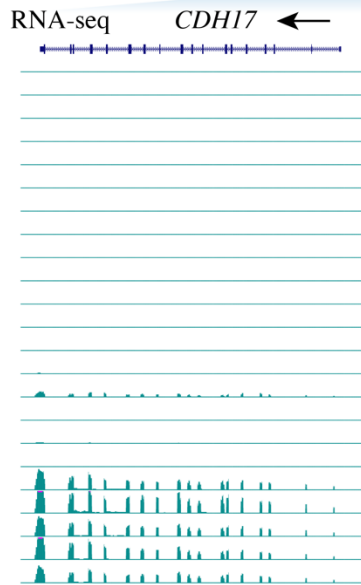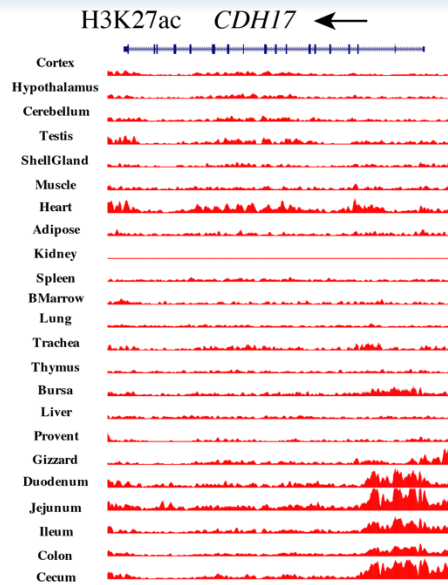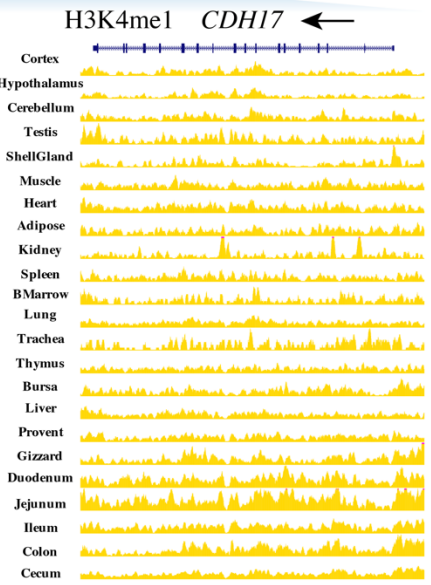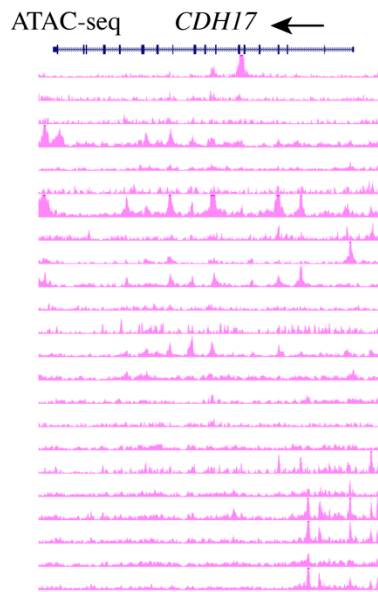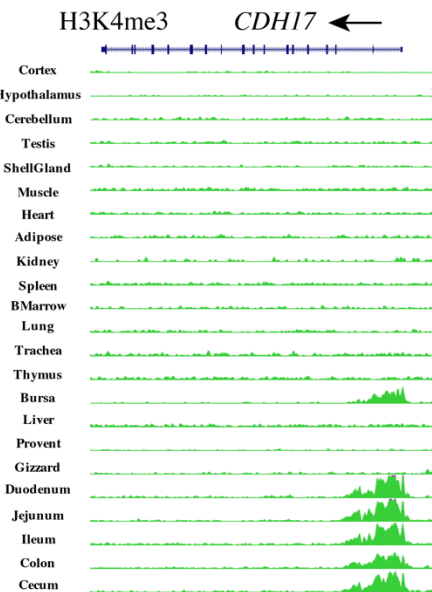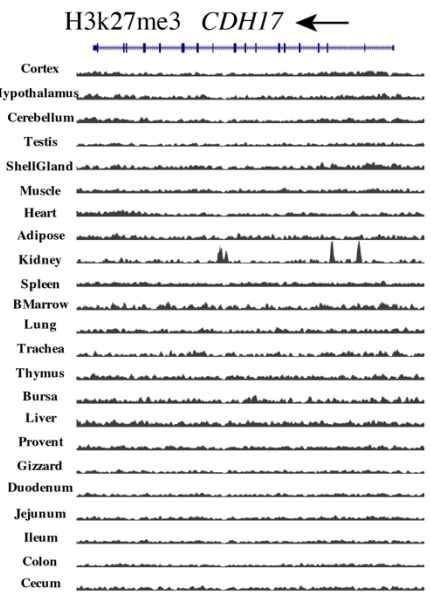

**Supplementary Fig. 9. Chromatin states around *CDH17* gene (chr2:125,878,923-125,908,898, galGal6) in 23 chicken tissues.** Vertical scale of UCSC tracks shows the normalized signal from 0 to 500 for RNA-seq, 0 to 150 for H3K27ac and H3K4me3, and 0 to 100 for other marks and ATAC-seq.

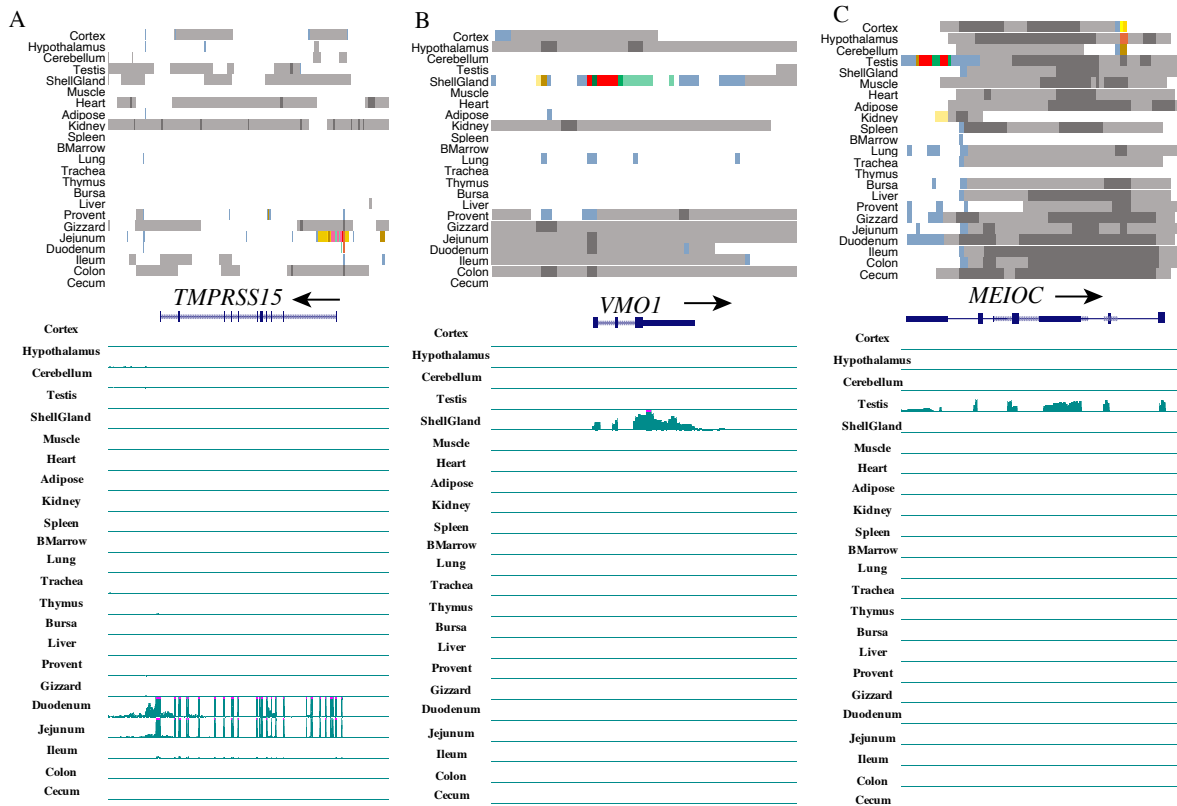

**Supplementary Fig. 10. Examples of genes regulated by chromatin states.** (A) Chromatin states and gene expression (normalized read counts) around Transmembrane Serine Protease 15 (*TMPRSS15*) (chr1:100,929,822-101,014,556). (B) Chromatin states and gene expression around Vitelline Membrane Outer Layer 1 Homolog (*VMO1*) (chr1:182,057,442-182,069,414). (C) Chromatin state and gene expression around Meiosis Specific with Coiled-Coil Domain (*MEIOC*) (chr27:3,604,663-3,618,779), which is a germ-cell specific factor conserved in most metazoans. Vertical scale of UCSC tracks (bottom) shows the normalized read counts from 0 to 100 for RNA-seq.

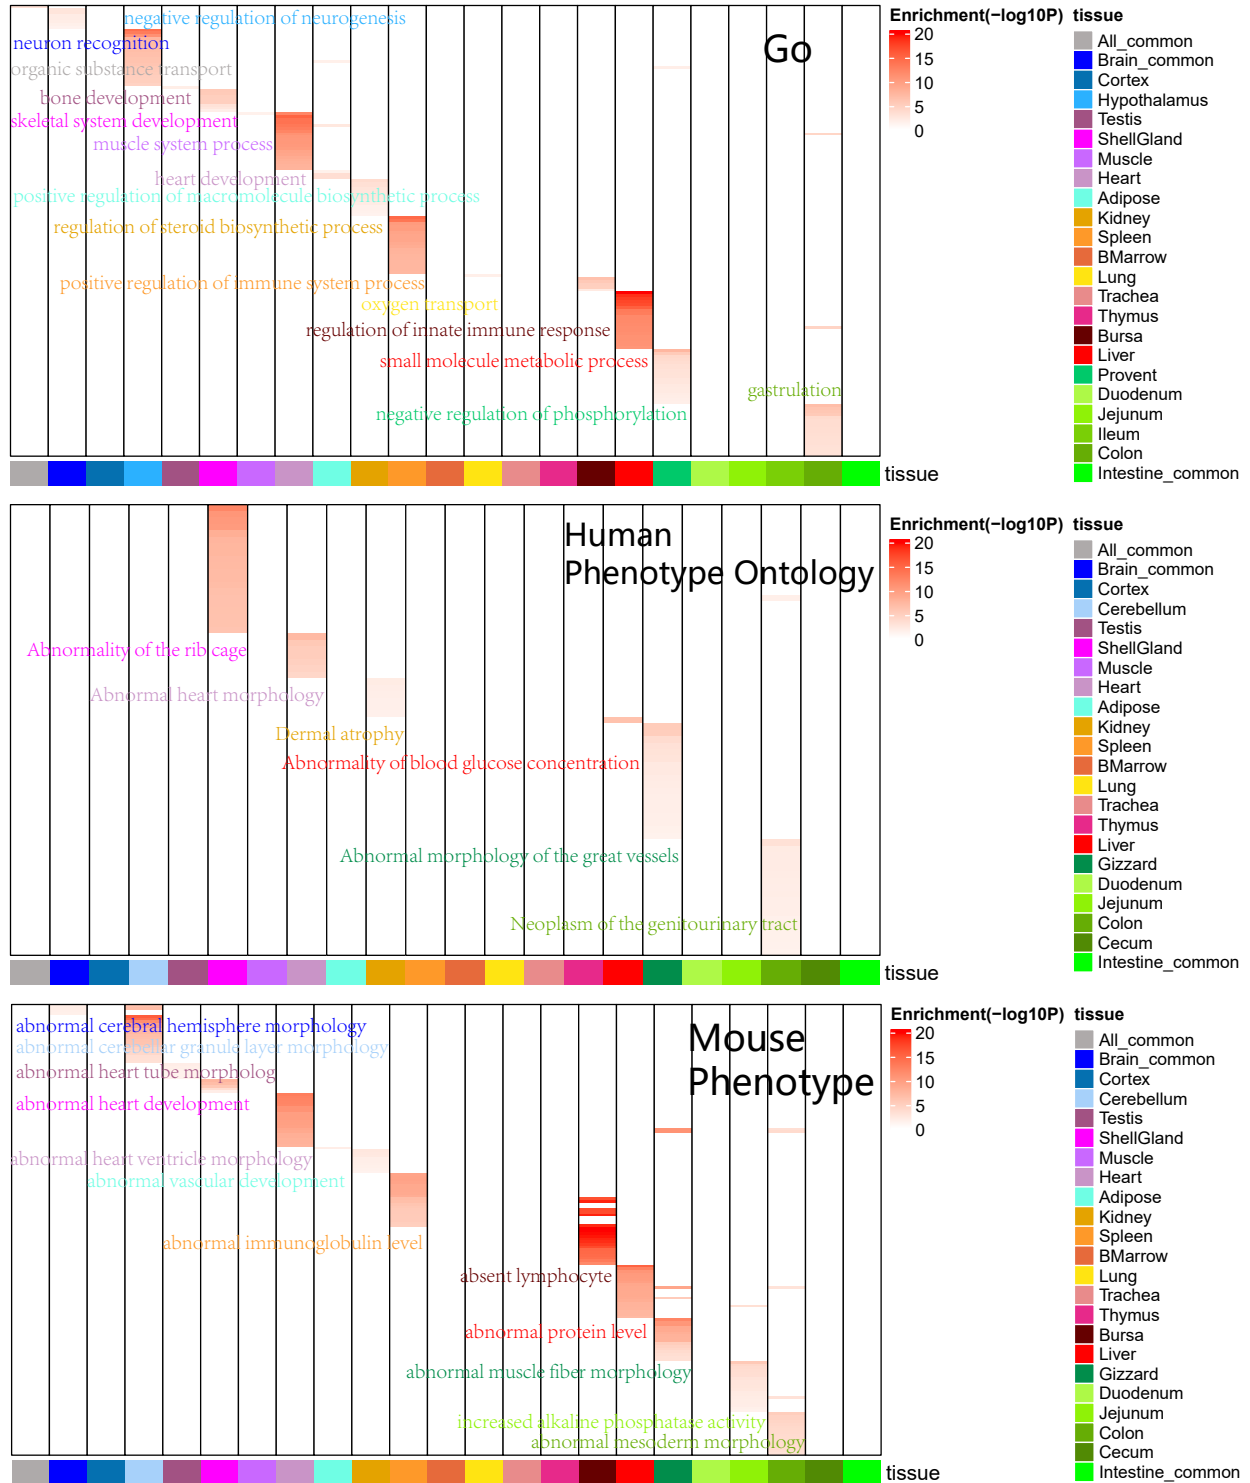

**Supplementary Fig. 11. GO function, human phenotype, and mouse phenotype in conserved (human and chicken) tissue-specific enhancer.** The columns represent 26 modules of EnhAs. The rows represent GO term, human phenotypes and mouse phenotype. Notes within the heatmap summarized nearby GO term, enriched phenotypes and mouse phenotype, with the color of the text indicating the corresponding tissue.

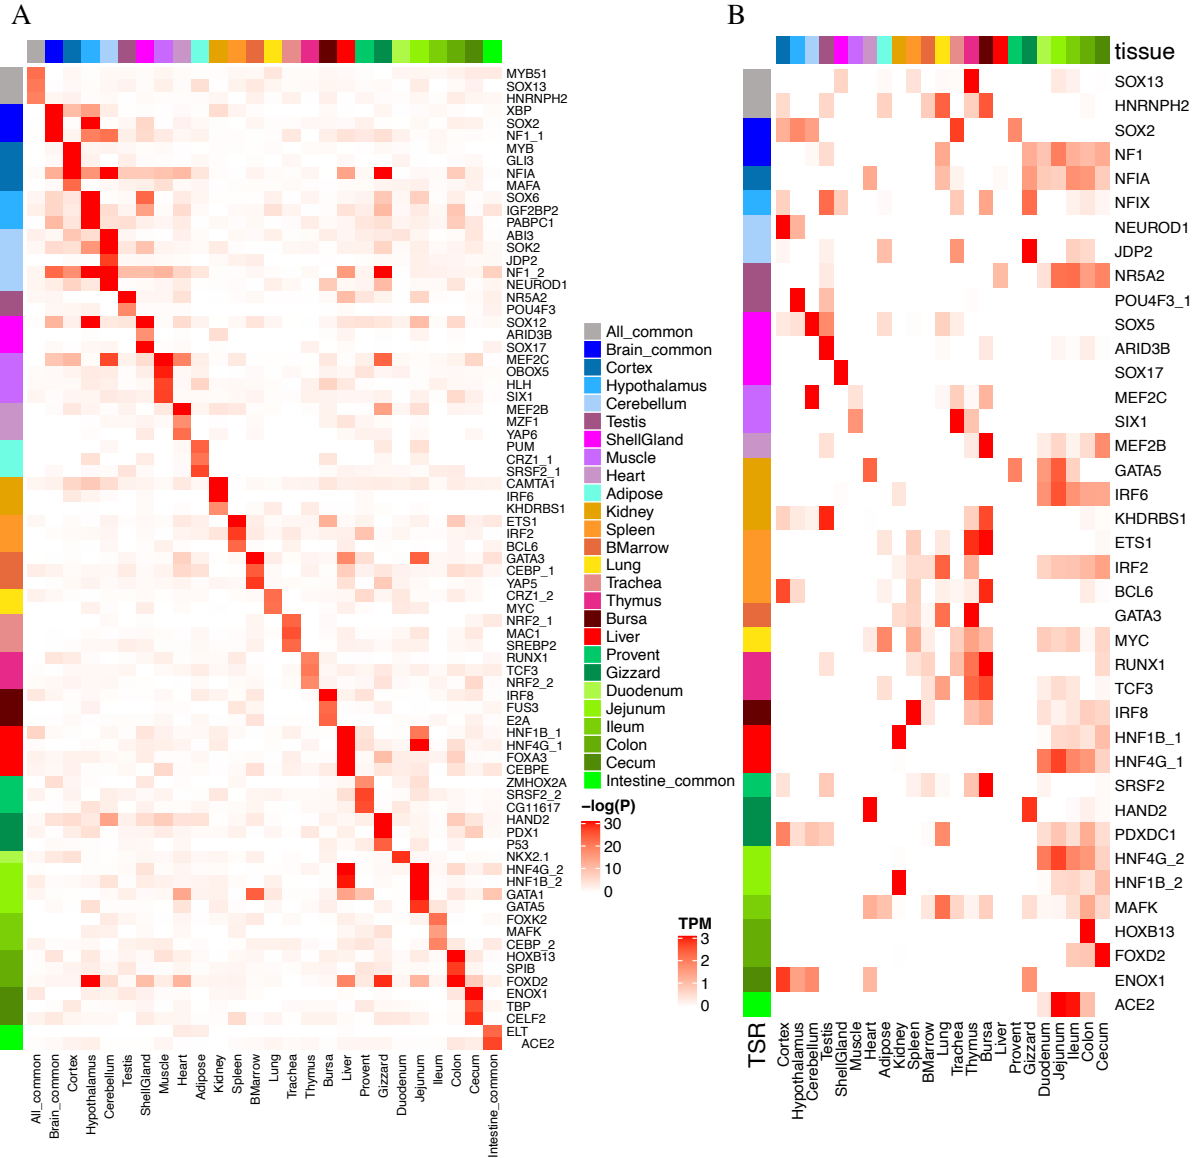

**Supplementary Fig. 12. Motif enrichment of tissue-specific strong enhancers (EnhAs).** (A), The enrichment of major motif across 23 tissues. The  $P$  value was generated by HOMMER. (B) The expression level (TPM) of corresponding transcriptional factors in 23 tissues.

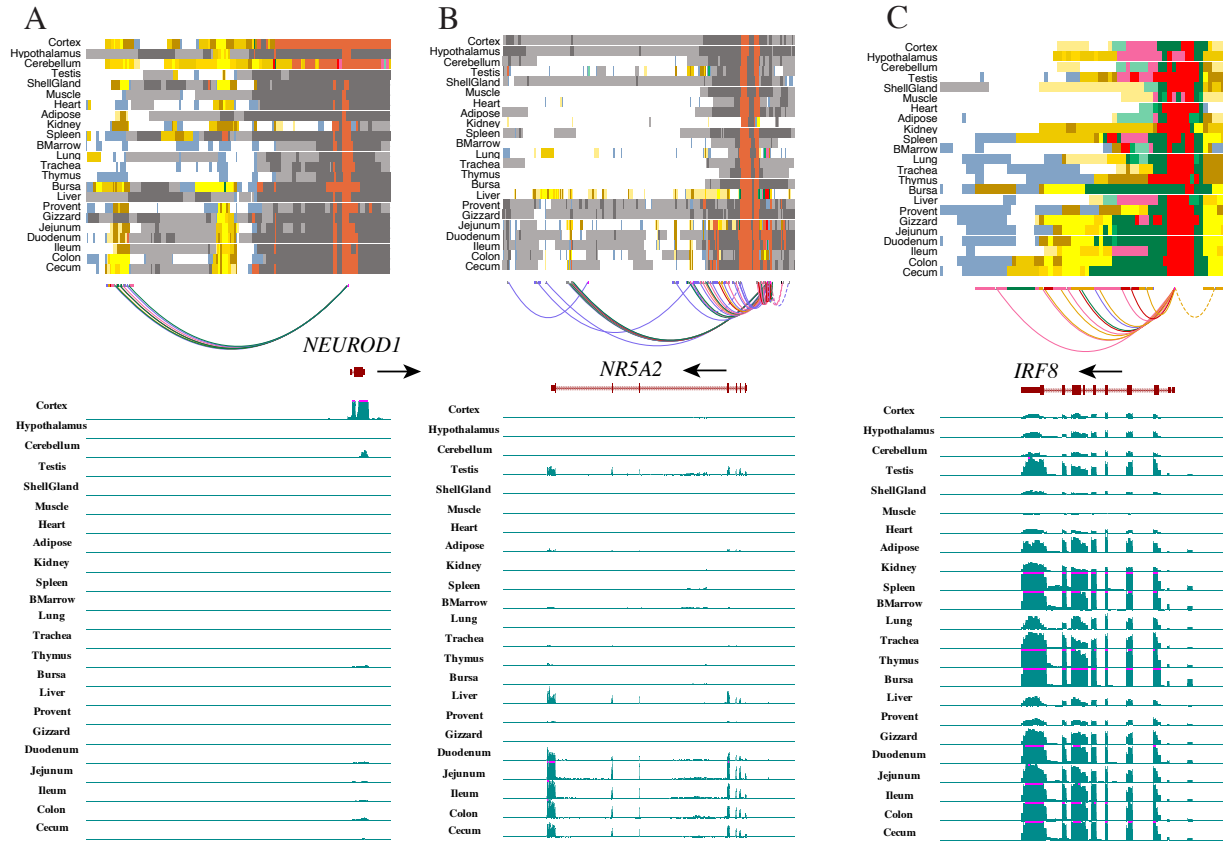

**Supplementary Fig. 13. Examples of transcriptional factors (TF) binding to tissue-specific strong enhancers (EnhAs).** (A) *NEUROD1* (chr7:14,223,290-14,263,375). (B) *NR5A2* (chr8:1,968,961-2,079,138), (C) *IRF8* (chr11:17,586,856-17,599,302). Vertical scale of UCSC tracks (bottom) shows the normalized read counts from 0 to 100 for RNA-seq.

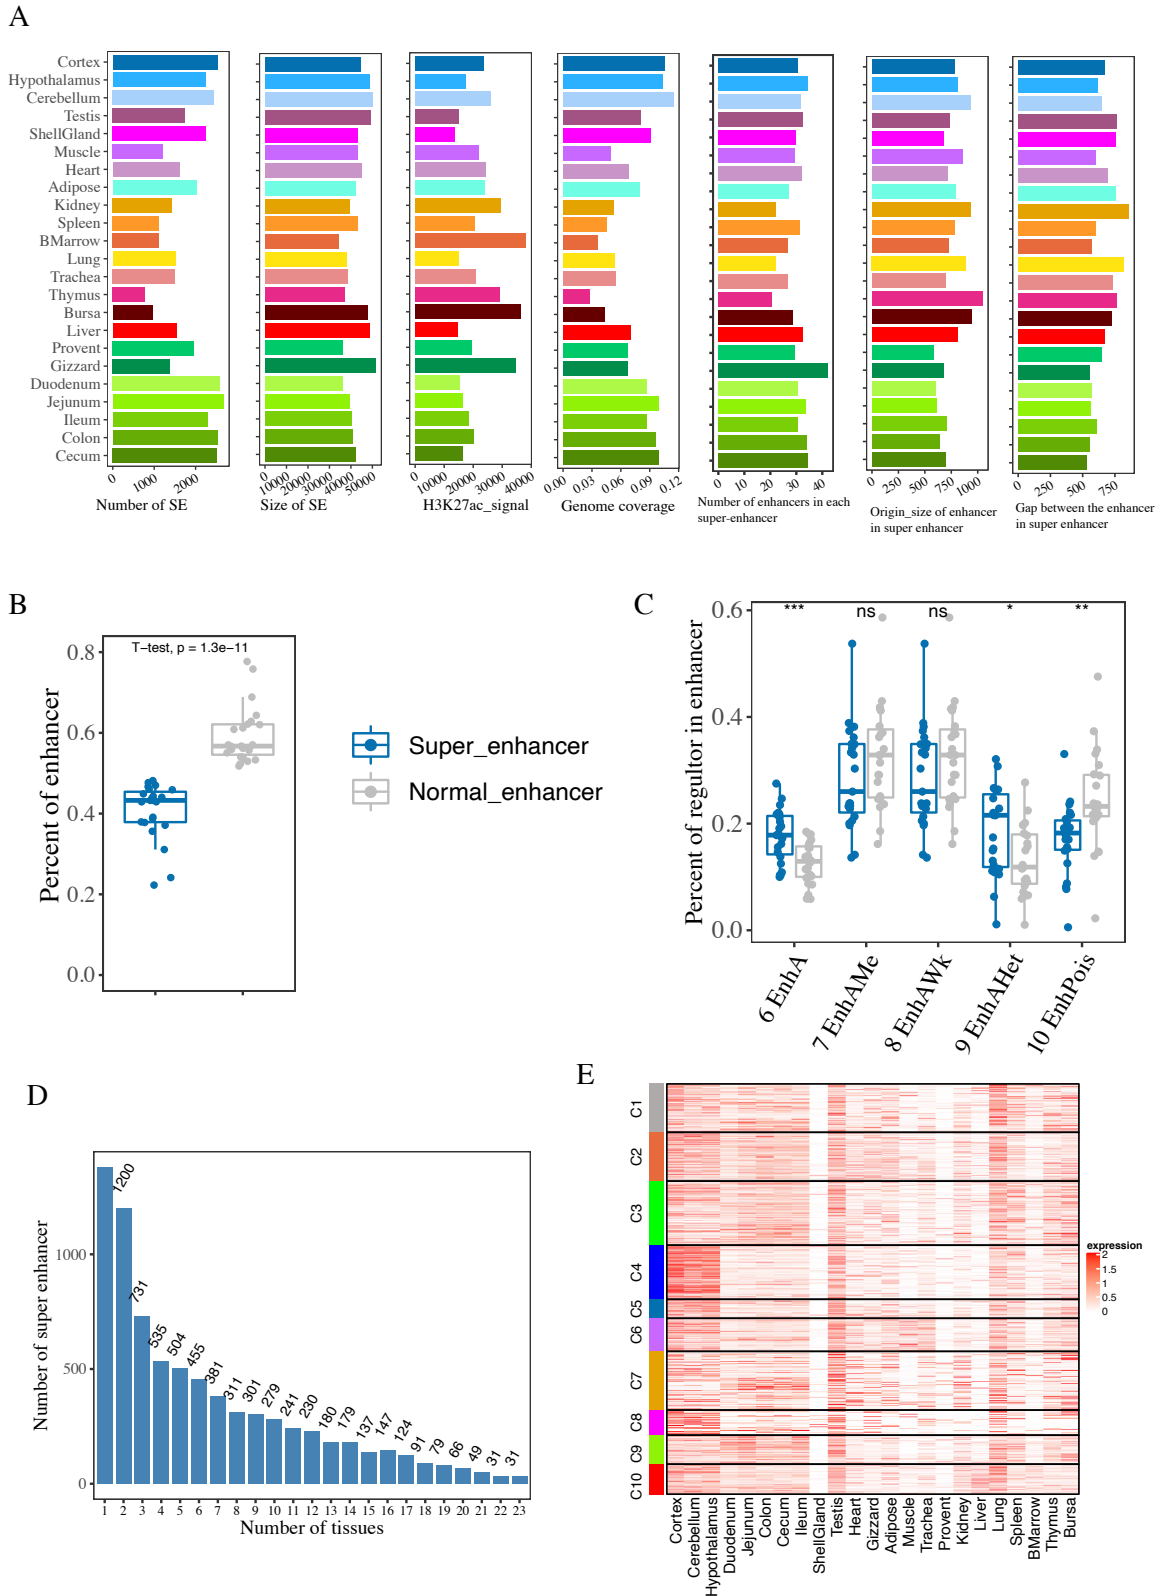

**Supplementary Fig. 14. Summary of super-enhancers in chicken. (A)** The distribution of number, length, H3K27ac signal intensity, and genome coverage of super-enhancers, as well as

number of normal enhancers, length of normal enhancers and gap between normal enhancers per super-enhancer across 23 tissues. (B) The proportion of enhancers in super-enhancers and normal enhancers. (C) The percent of each of five enhancer types in super-enhancers and normal enhancers. (D) The number of super-enhancers shared across tissues. (E) The expression (normalized TPM) of super-enhancer target genes in each cluster.

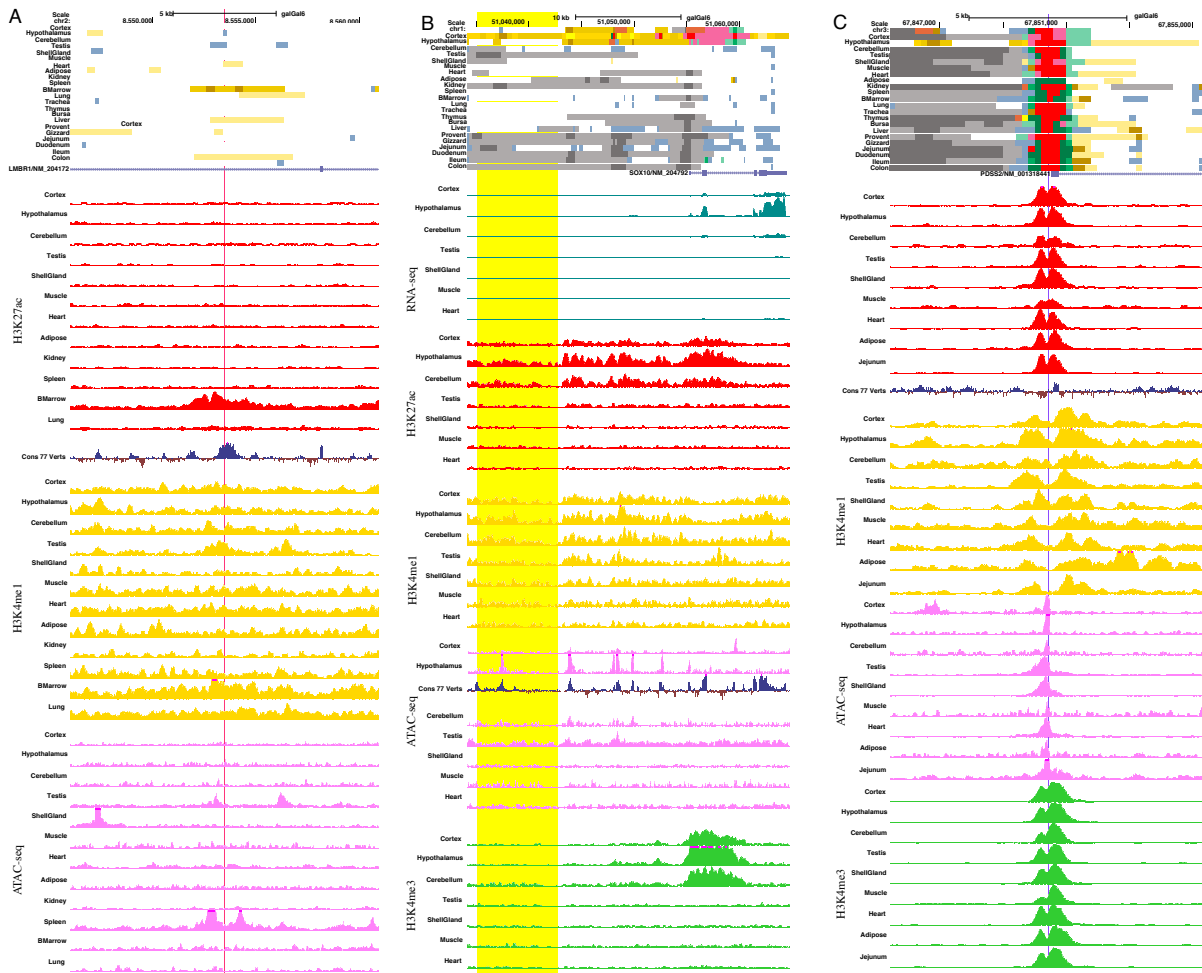

**Supplementary Fig. 15. Causal variants within regulator elements.** (A) The chromatin state and epi-peak around a potential causal SNP (SNP (chr2:8553470G>T, rs80659072) of Polydactyly. The red line means where the SNP located. (B) The chromatin state and epi-peak around a deletion (g.51035106\_51042744delins) occurred the upstream of SOX10 which influences Dark brown/yellow plumage in chicken (chr1:51,034,163-51,064,718). The highlight region means the deletion region. (C) The chromatin state and epi-peak around a single base change (chr3:67850419C>G, rs316090093) that results in the Silky/Silkie (chr3:67,845,419-67,855,418). The blue line means where the SNP located. For (A) and (B), Vertical scale of UCSC tracks shows the normalized read counts from 0 to 100 for RNA-seq, 0 to 150 for H3K27ac, and 0 to 50 for

H3K4me1, 0 to 150 for H3K4me3, 0 to 100 for H3K27me3; for (C) Vertical scale of UCSC set auto-scale.

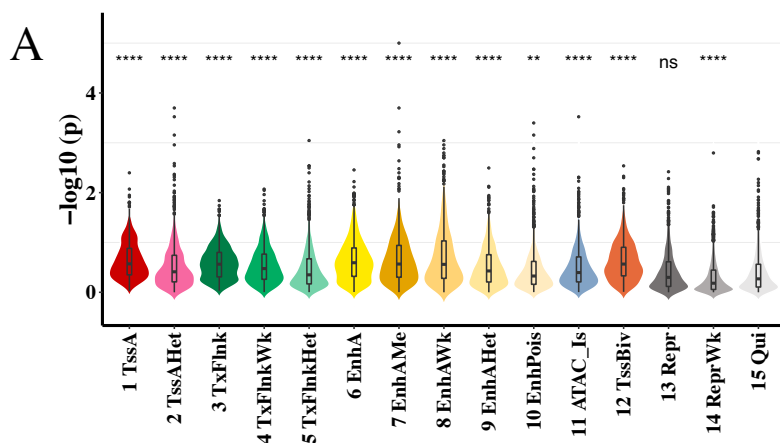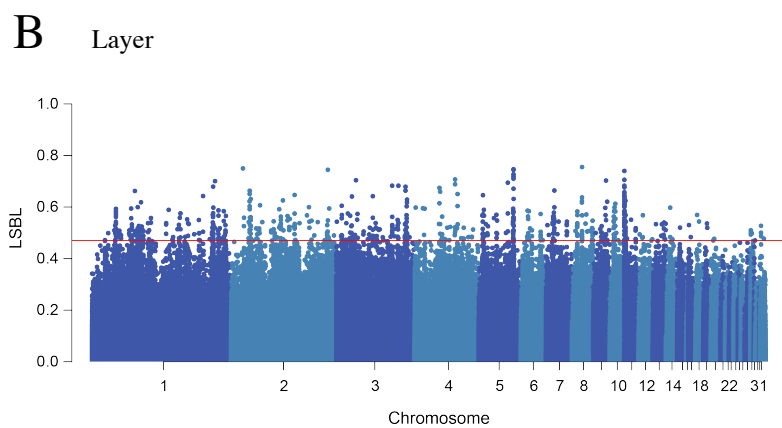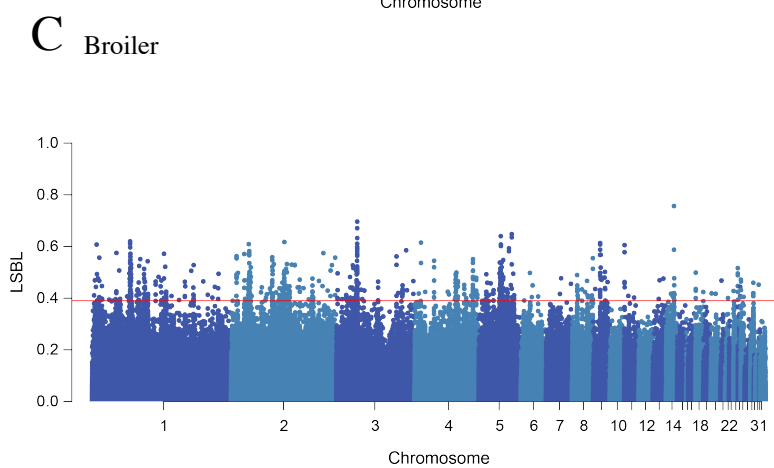



**Supplementary Fig. 16. GWAS signal and selection signature.** (A) GWAS signal enrichment of 15 chromatin states across 23 tissues for 44 complex traits in chicken. The statistical significance of comparisons between chromatin states were calculated by two-sided *t*-test using “15 Qui” as a reference. \*\*\* $P < 0.001$ . Whiskers show 1.5× interquartile range. Black points were outliers. The Manhattan plot of selection signatures (LSBL) in Layer (B) and in Broiler (C).

**Supplementary Table:**

Supplementary Table 1. The 377 genome-wide sequencing datasets using in this study

Supplementary Table 2. The summary of data quality of all the ChIP-seq of epi-marks, control, ATAC-seq, RRBS and RNA-seq data sets of chicken

Supplementary Table 3. the number, genome coverage and size of chromatin state in 23 tissues.

Supplementary Table 4. The genes in chicken specific evolution breakpoint regions

Supplementary Table 5. The gene ontology (GO) enrichment of three kinds of genes with different number of enhancers

Supplementary Table 6. The number and size of tissue specific regulator elements in 23 tissues

Supplementary Table 7. The top 10 GO functional enrichment of genes within super-enhancer of each cluster

Supplementary Table 8. The chicken likely (known) causal variants and their regulators

Supplementary Table 9. The data summary of chicken GWAS used in this study

Supplementary Table 10. The selective sweeps (LSBL) in chicken domestication by using GGJ (*G. g. jabouillei*) and GGM (*G. g. murghi*) as outgroups

Supplementary Table 11. The selective sweeps (LSBL) in Broiler and Layer breeding

Supplementary Table 12. The enrichment of tissue specific enhancer in selection signature

## REFERENCES AND NOTES

1. D. W. Burt, Chicken genome: Current status and future opportunities. *Genome Res.* **15**, 1692–1698 (2005).
2. T. H. Beacon, J. R. Davie, The chicken model organism for epigenomic research. *Genome* **64**, 476–489 (2021).
3. H. Giral, U. Landmesser, A. Kratzer, Into the wild: GWAS exploration of non-coding RNAs. *Front. Cardiovasc. Med.* **5**, 181 (2018).
4. C. M. Carnielli, F. V. Winck, A. F. Paes Leme Functional annotation and biological interpretation of proteomics data. *Biochim. Biophys. Acta* **1854**, 46–54 (2015).
5. E. Cano-Gamez, G. Trynka, From GWAS to function: Using functional genomics to identify the mechanisms underlying complex diseases. *Front. Genet.* **11**, 424 (2020).
6. C. Márquez-Luna, S. Gazal, P.-R. Loh, S. S. Kim, N. Furlotte, A. Auton; 23andMe Research Team, A. L. Price, Incorporating functional priors improves polygenic prediction accuracy in UK Biobank and 23andMe data sets. *Nat. Commun.* **12**, 6052 (2021).
7. D. U. Gorkin, I. Barozzi, Y. Zhao, Y. Zhang, H. Huang, A. Y. Lee, B. Li, J. Chiou, A. Wildberg, B. Ding, B. Zhang, M. Wang, J. S. Strattan, J. M. Davidson, Y. Qiu, V. Afzal, J. A. Akiyama, I. Plajzer-Frick, C. S. Novak, M. Kato, T. H. Garvin, Q. T. Pham, A. N. Harrington, B. J. Mannion, E. A. Lee, Y. Fukuda-Yuzawa, Y. He, S. Preissl, S. Chee, J. Y. Han, B. A. Williams, D. Trout, H. Amrhein, H. Yang, J. M. Cherry, W. Wang, K. Gaulton, J. R. Ecker, Y. Shen, D. E. Dickel, A. Visel, L. A. Pennacchio, B. Ren, An atlas of dynamic chromatin landscapes in mouse fetal development. *Nature* **583**, 744–751 (2020).
8. Z. Pan, Y. Yao, H. Yin, Z. Cai, Y. Wang, L. Bai, C. Kern, M. Halstead, G. Chanthavixay, N. Trakooljul, K. Wimmers, G. Sahana, G. Su, M. S. Lund, M. Fredholm, P. Karlskov-Mortensen, C. W. Ernst, P. Ross, C. K. Tuggle, L. Fang, H. Zhou, Pig genome functional annotation enhances the biological interpretation of complex traits and human disease. *Nat. Commun.* **12**, 5848 (2021).

9. L. Fang, S. Liu, M. Liu, X. Kang, S. Lin, B. Li, E. E. Connor, R. L. Baldwin VI, A. Tenesa, L. Ma, G. E. Liu, C. J. Li, Functional annotation of the cattle genome through systematic discovery and characterization of chromatin states and butyrate-induced variations. *BMC Biol.* **17**, 68 (2019).
10. S. Foissac, S. Djebali, K. Munyard, N. Vialaneix, A. Rau, K. Muret, D. Esquerré, M. Zytnicki, T. Derrien, P. Bardou, F. Blanc, C. Cabau, E. Crisci, S. Dhorne-Pollet, F. Drouet, T. Faraut, I. Gonzalez, A. Goubil, S. Lacroix-Lamandé, F. Laurent, S. Marthey, M. Marti-Marimon, R. Momal-Leisenring, F. Mompарт, P. Quéré, D. Robelin, M. S. Cristobal, G. Tosser-Klopp, S. Vincent-Naulleau, S. Fabre, M. H. Pinard-van der Laan, C. Klopp, M. Tixier-Boichard, H. Acloque, S. Lagarrigue, E. Giuffra, Multi-species annotation of transcriptome and chromatin structure in domesticated animals. *BMC Biol.* **17**, 108 (2019).
11. S. Liu, Y. Yu, S. Zhang, J. B. Cole, A. Tenesa, T. Wang, T. G. McDanel, L. Ma, G. E. Liu, L. Fang, Epigenomics and genotype-phenotype association analyses reveal conserved genetic architecture of complex traits in cattle and human. *BMC Biol.* **18**, 80 (2020).
12. C. Kern, Y. Wang, X. Xu, Z. Pan, M. Halstead, G. Chanthavixay, P. Saelao, S. Waters, R. Xiang, A. Chamberlain, I. Korf, M. E. Delany, H. H. Cheng, J. F. Medrano, A. L. van Eenennaam, C. K. Tuggle, C. Ernst, P. Flicek, G. Quon, P. Ross, H. Zhou, Functional annotations of three domestic animal genomes provide vital resources for comparative and agricultural research. *Nat. Commun.* **12**, 1821 (2021).
13. N. Couto, Z. M. al-Majdoub, S. Gibson, P. J. Davies, B. Achour, M. D. Harwood, G. Carlson, J. Barber, A. Rostami-Hodjegan, G. Warhurst, Quantitative proteomics of clinically relevant drug-metabolizing enzymes and drug transporters and their intercorrelations in the human small intestine. *Drug Metab. Dispos.* **48**, 245–254 (2020).
14. N. C. Panarelli, R. K. Yantiss, M. M. Yeh, Y. Liu, Y.-T. Chen, Tissue-specific cadherin CDH17 is a useful marker of gastrointestinal adenocarcinomas with higher sensitivity than CDX2. *Am. J. Clin. Pathol.* **138**, 211–222 (2012).
15. J. Ernst, M. Kellis, ChromHMM: Automating chromatin-state discovery and characterization. *Nat. Methods* **9**, 215–216 (2012).

16. M. Farré, J. Kim, A. A. Proskuryakova, Y. Zhang, A. I. Kulemzina, Q. Li, Y. Zhou, Y. Xiong, J. L. Johnson, P. Perelman, W. E. Johnson, W. C. Warren, A. V. Kukekova, G. Zhang, S. J. O'Brien, O. A. Ryder, A. S. Graphodatsky, J. Ma, H. A. Lewin, D. M. Larkin, Evolution of gene regulation in ruminants differs between evolutionary breakpoint regions and homologous synteny blocks. *Genome Res.* **29**, 576–589 (2019).
17. A. Visel, S. Minovitsky, I. Dubchak, L. A. Pennacchio, VISTA Enhancer Browser—A database of tissue-specific human enhancers. *Nucleic Acids Res.* **35**, D88–D92 (2007).
18. Roadmap Epigenomics Consortium, A. Kundaje, W. Meuleman, J. Ernst, M. Bilenky, A. Yen, A. Heravi-Moussavi, P. Kheradpour, Z. Zhang, J. Wang, M. J. Ziller, V. Amin, J. W. Whitaker, M. D. Schultz, L. D. Ward, A. Sarkar, G. Quon, R. S. Sandstrom, M. L. Eaton, Y.-C. Wu, A. R. Pfenning, X. Wang, M. Claussnitzer, Y. Liu, C. Coarfa, R. A. Harris, N. Shores, C. B. Epstein, E. Gjoneska, D. Leung, W. Xie, R. D. Hawkins, R. Lister, C. Hong, P. Gascard, A. J. Mungall, R. Moore, E. Chuah, A. Tam, T. K. Canfield, R. S. Hansen, R. Kaul, P. J. Sabo, M. S. Bansal, A. Carles, J. R. Dixon, K.-H. Farh, S. Feizi, R. Karlic, A.-R. Kim, A. Kulkarni, D. Li, R. Lowdon, G. N. Elliott, T. R. Mercer, S. J. Neph, V. Onuchic, P. Polak, N. Rajagopal, P. Ray, R. C. Sallari, K. T. Siebenthal, N. A. Sinnott-Armstrong, M. Stevens, R. E. Thurman, J. Wu, B. Zhang, X. Zhou, A. E. Beaudet, L. A. Boyer, P. L. De Jager, P. J. Farnham, S. J. Fisher, D. Haussler, S. J. M. Jones, W. Li, M. A. Marra, M. T. McManus, S. Sunyaev, J. A. Thomson, T. D. Tlsty, L.-H. Tsai, W. Wang, R. A. Waterland, M. Q. Zhang, L. H. Chadwick, B. E. Bernstein, J. F. Costello, J. R. Ecker, M. Hirst, A. Meissner, A. Milosavljevic, B. Ren, J. A. Stamatoyannopoulos, T. Wang, M. Kellis, Integrative analysis of 111 reference human epigenomes. *Nature* **518**, 317–330 (2015).
19. R. Valdez, C. A. Cavinder, D. D. Varner, T. H. Welsh Jr., M. M. Vogelsang, N. H. Ing, Dexamethasone downregulates expression of several genes encoding orphan nuclear receptors that are important to steroidogenesis in stallion testes. *J. Biochem. Mol. Toxicol.* **33**, e22309 (2019).
20. A. Bobbs, K. Gellerman, W. M. Hallas, S. Joseph, C. Yang, J. Kurkewich, K. D. Cowden Dahl, ARID3B directly regulates ovarian cancer promoting genes. *PLOS ONE* **10**, e0131961 (2015).
21. H. Wang, S. Jain, P. Li, J. X. Lin, J. Oh, C. Qi, Y. Gao, J. Sun, T. Sakai, Z. Naghashfar, S. Abbasi, A. L. Kovalchuk, S. Bolland, S. L. Nutt, W. J. Leonard, H. C. Morse III, Transcription factors IRF8 and PU. 1

- are required for follicular B cell development and BCL6-driven germinal center responses. *Proc. Natl. Acad. Sci. U.S.A.* **116**, 9511–9520 (2019).
22. D. Hnisz, B. J. Abraham, T. I. Lee, A. Lau, V. Saint-André, A. A. Sigova, H. A. Hoke, R. A. Young, Super-enhancers in the control of cell identity and disease. *Cell* **155**, 934–947 (2013).
23. X. Wang, M. J. Cairns, J. Yan, Super-enhancers in transcriptional regulation and genome organization. *Nucleic Acids Res.* **47**, 11481–11496 (2019).
24. T. Van Groningen, J. Koster, L. J. Valentijn, D. A. Zwijnenburg, N. Akogul, N. E. Hasselt, M. Broekmans, F. Haneveld, N. E. Nowakowska, J. Bras, C. J. M. van Noesel, A. Jongejan, A. H. van Kampen, L. Koster, F. Baas, L. van Dijk-Kerkhoven, M. Huizer-Smit, M. C. Lecca, A. Chan, A. Lakeman, P. Molenaar, R. Volckmann, E. M. Westerhout, M. Hamdi, P. G. van Sluis, M. E. Ebus, J. J. Molenaar, G. A. Tytgat, B. A. Westerman, J. van Nes, R. Versteeg, Neuroblastoma is composed of two super-enhancer-associated differentiation states. *Nat. Genet.* **49**, 1261–1266 (2017).
25. A. L. Hunter, T. M. Poolman, D. Kim, F. J. Gonzalez, D. A. Bechtold, A. S. I. Loudon, M. Iqbal, D. W. Ray, HNF4A modulates glucocorticoid action in the liver. *Cell Rep.* **39**, 110697 (2022).
26. R. Valverde, L. Edwards, L. Regan, Structure and function of KH domains. *FEBS J.* **275**, 2712–2726 (2008).
27. J. Rha, S. K. Jones, J. Fidler, A. Banerjee, S. W. Leung, K. J. Morris, J. C. Wong, G. A. S. Inglis, L. Shapiro, Q. Deng, A. A. Cutler, A. M. Hanif, M. T. Pardue, A. Schaffer, N. T. Seyfried, K. H. Moberg, G. J. Bassell, A. Escayg, P. S. García, A. H. Corbett, The RNA-binding protein, ZC3H14, is required for proper poly (A) tail length control, expression of synaptic proteins, and brain function in mice. *Hum. Mol. Genet.* **26**, 3663–3681 (2017).
28. J. Schödel, B. Klanke, A. Weidemann, B. Buchholz, W. Bernhardt, M. Bertog, K. Amann, C. Korbmayer, M. Wiesener, C. Warnecke, A. Kurtz, K. U. Eckardt, C. Willam, HIF-prolyl hydroxylases in the rat kidney: Physiologic expression patterns and regulation in acute kidney injury. *Am. J. Pathol.* **174**, 1663–1674 (2009).

29. M. Yang, Q. Liu, M. Dai, R. Peng, X. Li, W. Zuo, J. Gou, F. Zhou, S. Yu, H. Liu, M. Huang, FOXQ1-mediated SIRT1 upregulation enhances stemness and radio-resistance of colorectal cancer cells and restores intestinal microbiota function by promoting  $\beta$ -catenin nuclear translocation. *J. Exp. Clin. Cancer Res.* **41**, 70 (2022).
30. T. Ohtsuki, M. Koga, H. Ishiguro, Y. Horiuchi, M. Arai, K. Niizato, M. Itokawa, T. Inada, N. Iwata, S. Iritani, N. Ozaki, H. Kunugi, H. Ujike, Y. Watanabe, T. Someya, T. Arinami, A polymorphism of the metabotropic glutamate receptor mGluR7 (*GRM7*) gene is associated with schizophrenia. *Schizophr. Res.* **101**, 9–16 (2008).
31. L. A. Lettice, S. J. Heaney, L. A. Purdie, L. Li, P. de Beer, B. A. Oostra, D. Goode, G. Elgar, R. E. Hill, E. de Graaff, A long-range Shh enhancer regulates expression in the developing limb and fin and is associated with preaxial polydactyly. *Hum. Mol. Genet.* **12**, 1725–1735 (2003).
32. J. Sharpe, L. Lettice, J. Hecksher-Sørensen, M. Fox, R. Hill, R. Krumlauf, Identification of sonic hedgehog as a candidate gene responsible for the polydactylous mouse mutant Sasquatch. *Curr. Biol.* **9**, 97–100 (1999).
33. Q. Chu, Z. Yan, J. Zhang, T. Usman, Y. Zhang, H. Liu, H. Wang, A. Geng, H. Liu, Association of SNP rs80659072 in the ZRS with polydactyly in Beijing You chickens. *PLOS ONE* **12**, e0185953 (2017).
34. T. Zhu, M. Liu, S. Peng, X. Zhang, Y. Chen, X. Lv, W. Yang, K. Li, J. Zhang, H. Wang, H. Li, Z. Ning, L. Wang, L. Qu, A deletion upstream of SOX10 causes light yellow plumage colour in chicken. *Genes* **13**, 327 (2022).
35. U. Gunnarsson, S. Kerje, B. Bed'hom, A. S. Sahlqvist, O. Ekwall, M. Tixier-Boichard, O. Kämpe, L. Andersson, The Dark brown plumage color in chickens is caused by an 8.3-kb deletion upstream of SOX10. *Pigment Cell Melanoma Res.* **24**, 268–274 (2011).
36. C. Feng, Y. Gao, B. Dorshorst, C. Song, X. Gu, Q. Li, J. Li, T. Liu, C. J. Rubin, Y. Zhao, Y. Wang, J. Fei, H. Li, K. Chen, H. Qu, D. Shu, C. Ashwell, Y. da, L. Andersson, X. Hu, N. Li, A cis-regulatory mutation of PDSS2 causes silky-feather in chickens. *PLOS Genet.* **10**, e1004576 (2014).

37. C. A. Boix, B. T. James, Y. P. Park, W. Meuleman, M. Kellis, Regulatory genomic circuitry of human disease loci by integrative epigenomics. *Nature* **590**, 300–307 (2021).
38. Y. Wang, X. Cao, C. Luo, Z. Sheng, C. Zhang, C. Bian, C. Feng, J. Li, F. Gao, Y. Zhao, Z. Jiang, H. Qu, D. Shu, Ö. Carlborg, X. Hu, N. Li, Multiple ancestral haplotypes harboring regulatory mutations cumulatively contribute to a QTL affecting chicken growth traits. *Commun. Biol.* **3**, 472 (2020).
39. J. Yuan, K. Wang, G. Yi, M. Ma, T. Dou, C. Sun, L. J. Qu, M. Shen, L. Qu, N. Yang, Genome-wide association studies for feed intake and efficiency in two laying periods of chickens. *Genet. Sel. Evol.* **47**, 82 (2015).
40. H. K. Finucane, B. Bulik-Sullivan, A. Gusev, G. Trynka, Y. Reshef, P.-R. Loh, V. Anttila, H. Xu, C. Zang, K. Farh, S. Ripke, F. R. Day; ReproGen Consortium; Schizophrenia Working Group of the Psychiatric Genomics Consortium; RACI Consortium, S. Purcell, E. Stahl, S. Lindstrom, J. R. B. Perry, Y. Okada, S. Raychaudhuri, M. J. Daly, N. Patterson, B. M. Neale, A. L. Price, Partitioning heritability by functional annotation using genome-wide association summary statistics. *Nat. Genet.* **47**, 1228–1235 (2015).
41. D. Murawska, The effect of age on growth performance and carcass quality parameters in different poultry species. *Poult. Sci.*, 33–50 (2017).
42. G. Wang, W. K. Kim, M. A. Cline, E. R. Gilbert, Factors affecting adipose tissue development in chickens: A review. *Poult. Sci.* **96**, 3687–3699 (2017).
43. Y. G. Tan, X. L. Xu, H. Y. Cao, W. Zhou, Z. Z. Yin, Effect of age at first egg on reproduction performance and characterization of the hypothalamo-pituitary-gonadal axis in chickens. *Poult. Sci.* **100**, 101325 (2021).
44. M. S. Wang, M. Thakur, M. S. Peng, Y. Jiang, L. A. F. Frantz, M. Li, J. J. Zhang, S. Wang, J. Peters, N. O. Otecko, C. Suwannapoom, X. Guo, Z. Q. Zheng, A. Esmailizadeh, N. Y. Hirimuthugoda, H. Ashari, S. Suladari, M. S. A. Zein, S. Kusza, S. Sohrabi, H. Kharrati-Koopae, Q. K. Shen, L. Zeng, M. M. Yang, Y. J. Wu, X. Y. Yang, X. M. Lu, X. Z. Jia, Q. H. Nie, S. J. Lamont, E. Lasagna, S. Ceccobelli, H. G. T. N. Gunwardana, T. M. Senasige, S. H. Feng, J. F. Si, H. Zhang, J. Q. Jin, M. L. Li, Y. H. Liu, H.

- M. Chen, C. Ma, S. S. Dai, A. K. F. H. Bhuiyan, M. S. Khan, G. L. L. P. Silva, T. T. le, O. A. Mwai, M. N. M. Ibrahim, M. Supple, B. Shapiro, O. Hanotte, G. Zhang, G. Larson, J. L. Han, D. D. Wu, Y. P. Zhang, 863 genomes reveal the origin and domestication of chicken. *Cell Res.* **30**, 693–701 (2020).
45. M. Tixier-Boichard, S. Fabre, S. Dhorne-Pollet, A. Goubil, H. Acloque, S. Vincent-Naulleau, P. Ross, Y. Wang, G. Chanthavixay, H. Cheng, C. Ernst, V. Leesburg, E. Giuffra, H. Zhou; Collaborative Working Group, Tissue resources for the functional annotation of animal genomes. *Front. Genet.* **12**, 666265 (2021).
46. G. Chanthavixay, C. Kern, Y. Wang, P. Saelao, S. J. Lamont, R. A. Gallardo, G. Rincon, H. Zhou, Integrated transcriptome and histone modification analysis reveals NDV infection under heat stress affects bursa development and proliferation in susceptible chicken line. *Front. Genet.* **11**, 567812 (2020).
47. M. R. Corces, A. E. Trevino, E. G. Hamilton, P. G. Greenside, N. A. Sinnott-Armstrong, S. Vesuna, A. T. Satpathy, A. J. Rubin, K. S. Montine, B. Wu, A. Kathiria, S. W. Cho, M. R. Mumbach, A. C. Carter, M. Kasowski, L. A. Orloff, V. I. Risca, A. Kundaje, P. A. Khavari, T. J. Montine, W. J. Greenleaf, H. Y. Chang, An improved ATAC-seq protocol reduces background and enables interrogation of frozen tissues. *Nat. Methods* **14**, 959–962 (2017).
48. M. Halstead, C. Kern, P. Saelao, G. Chanthavixay, Y. Wang, M. E. Delany, H. Zhou, P. J. Ross, Systematic alteration of ATAC-seq for profiling open chromatin in cryopreserved nuclei preparations from livestock tissues. *Sci. Rep.* **10**, 5230 (2020).
49. H. Sun, P. Liu, L. K. Nolan, S. J. Lamont, Avian pathogenic *Escherichia coli* (APEC) infection alters bone marrow transcriptome in chickens. *BMC Genomics* **16**, 690 (2015).
50. F. Krueger, Trim Galore!: A wrapper tool around Cutadapt and FastQC to consistently apply quality and adapter trimming to FastQ files. (2015).
51. A. Dobin, C. A. Davis, F. Schlesinger, J. Drenkow, C. Zaleski, S. Jha, P. Batut, M. Chaisson, T. R. Gingeras, STAR: Ultrafast universal RNA-seq aligner. *Bioinformatics* **29**, 15–21 (2013).
52. H. Li, Aligning sequence reads, clone sequences and assembly contigs with BWA-MEM. arXiv:1303.3997 (2013).



53. H. Li, B. Handsaker, A. Wysoker, T. Fennell, J. Ruan, N. Homer, G. Marth, G. Abecasis, R. Durbin; 1000 Genome Project Data Processing Subgroup, The Sequence Alignment/Map format and SAMtools. *Bioinformatics* **25**, 2078–2079 (2009).
54. S. Anders, P. T. Pyl, W. Huber, HTSeq—A Python framework to work with high-throughput sequencing data. *Bioinformatics* **31**, 166–169 (2015).
55. S. Kovaka, A. V. Zimin, G. M. Pertea, R. Razaghi, S. L. Salzberg, M. Pertea, Transcriptome assembly from long-read RNA-seq alignments with StringTie2. *Genome Biol.* **20**, 278 (2019).
56. Y. Zhang, T. Liu, C. A. Meyer, J. Eeckhoute, D. S. Johnson, B. E. Bernstein, C. Nusbaum, R. M. Myers, M. Brown, W. Li, X. S. Liu, Model-based analysis of ChIP-Seq (MACS). *Genome Biol.* **9**, R137 (2008).
57. F. Krueger, S. R. Andrews, Bismark: A flexible aligner and methylation caller for Bisulfite-Seq applications. *Bioinformatics* **27**, 1571–1572 (2011).
58. N. C. Durand, M. S. Shamim, I. Machol, S. S. P. Rao, M. H. Huntley, E. S. Lander, E. L. Aiden, Juicer provides a one-click system for analyzing loop-resolution Hi-C experiments. *Cell Syst.* **3**, 95–98 (2016).
59. F. Ramírez, D. P. Ryan, B. Grüning, V. Bhardwaj, F. Kilpert, A. S. Richter, S. Heyne, F. Dündar, T. Manke, deepTools2: A next generation web server for deep-sequencing data analysis. *Nucleic Acids Res.* **44**, W160–W165 (2016).
60. P. Virtanen, R. Gommers, T. E. Oliphant, M. Haberland, T. Reddy, D. Cournapeau, E. Burovski, P. Peterson, W. Weckesser, J. Bright, S. J. van der Walt, M. Brett, J. Wilson, K. J. Millman, N. Mayorov, A. R. J. Nelson, E. Jones, R. Kern, E. Larson, C. J. Carey, Í. Polat, Y. Feng, E. W. Moore, J. V. Plas, D. Laxalde, J. Perktold, R. Cimrman, I. Henriksen, E. A. Quintero, C. R. Harris, A. M. Archibald, A. H. Ribeiro, F. Pedregosa, P. van Mulbregt; SciPy 1.0 Contributors, SciPy 1.0: Fundamental algorithms for scientific computing in Python. *Nat. Methods* **17**, 261–272 (2020).
61. A. R. Quinlan, BEDTools: The Swiss-army tool for genome feature analysis. *Curr. Protoc. Bioinformatics* **47**, 11.12.1–11.12.34 (2014).

62. C. E. Grant, T. L. Bailey, W. S. Noble, FIMO: Scanning for occurrences of a given motif. *Bioinformatics* **27**, 1017–1018 (2011).
63. M. Oti, J. Falck, M. A. Huynen, H. Zhou, CTCF-mediated chromatin loops enclose inducible gene regulatory domains. *BMC Genomics* **17**, 252 (2016).
64. I. Yanai, H. Benjamin, M. Shmoish, V. Chalifa-Caspi, M. Shklar, R. Ophir, A. Bar-Even, S. Horn-Saban, M. Safran, E. Domany, D. Lancet, O. Shmueli, Genome-wide midrange transcription profiles reveal expression level relationships in human tissue specification. *Bioinformatics* **21**, 650–659 (2005).
65. T. Wu, E. Hu, S. Xu, M. Chen, P. Guo, Z. Dai, T. Feng, L. Zhou, W. Tang, L. Zhan, X. Fu, S. Liu, X. Bo, G. Yu, clusterProfiler 4.0: A universal enrichment tool for interpreting omics data. *Innovation* **2**, 100141 (2021).
66. S. Heinz, C. Benner, N. Spann, E. Bertolino, Y. C. Lin, P. Laslo, J. X. Cheng, C. Murre, H. Singh, C. K. Glass, Simple combinations of lineage-determining transcription factors prime cis-regulatory elements required for macrophage and B cell identities. *Mol. Cell* **38**, 576–589 (2010).
67. W. A. Whyte, D. A. Orlando, D. Hnisz, B. J. Abraham, C. Y. Lin, M. H. Kagey, P. B. Rahl, T. I. Lee, R. A. Young, Master transcription factors and mediator establish super-enhancers at key cell identity genes. *Cell* **153**, 307–319 (2013).
68. J. Lovén, H. A. Hoke, C. Y. Lin, A. Lau, D. A. Orlando, C. R. Vakoc, J. E. Bradner, T. I. Lee, R. A. Young, Selective inhibition of tumor oncogenes by disruption of super-enhancers. *Cell* **153**, 320–334 (2013).
69. Z. Gu, R. Eils, M. Schlesner, Complex heatmaps reveal patterns and correlations in multidimensional genomic data. *Bioinformatics* **32**, 2847–2849 (2016).
70. R. Yang, X. Guo, D. Zhu, C. Tan, C. Bian, J. Ren, Z. Huang, Y. Zhao, G. Cai, D. Liu, Z. Wu, Y. Wang, N. Li, X. Hu, Accelerated deciphering of the genetic architecture of agricultural economic traits in pigs using a low-coverage whole-genome sequencing strategy. *Gigascience* **10**, giab048 (2021).

71. L. Jiang, Z. Zheng, T. Qi, K. E. Kemper, N. R. Wray, P. M. Visscher, J. Yang, A resource-efficient tool for mixed model association analysis of large-scale data. *Nat. Genet.* **51**, 1749–1755 (2019).
72. L. Fang, W. Cai, S. Liu, O. Canela-Xandri, Y. Gao, J. Jiang, K. Rawlik, B. Li, S. G. Schroeder, B. D. Rosen, C. J. Li, T. S. Sonstegard, L. J. Alexander, C. P. van Tassell, P. M. VanRaden, J. B. Cole, Y. Yu, S. Zhang, A. Tenesa, L. Ma, G. E. Liu, Comprehensive analyses of 723 transcriptomes enhance genetic and biological interpretations for complex traits in cattle. *Genome Res.* **30**, 790–801 (2020).
73. S. Qanbari, C. J. Rubin, K. Maqbool, S. Weigend, A. Weigend, J. Geibel, S. Kerje, C. Wurmser, A. T. Peterson, I. L. Brisbin, R. Preisinger, R. Fries, H. Simianer, L. Andersson, Genetics of adaptation in modern chicken. *PLOS Genet.* **15**, e1007989 (2019).
74. M. D. Shriver, G. C. Kennedy, E. J. Parra, H. A. Lawson, V. Sonpar, J. Huang, J. M. Akey, K. W. Jones, The genomic distribution of population substructure in four populations using 8,525 autosomal SNPs. *Hum. Genomics* **1**, 274–286 (2004).
75. A. Heger, C. Webber, M. Goodson, C. P. Ponting, G. Lunter, GAT: A simulation framework for testing the association of genomic intervals. *Bioinformatics* **29**, 2046–2048 (2013).
76. C. C. Chang, C. C. Chow, L. C. A. M. Tellier, S. Vattikuti, S. M. Purcell, J. J. Lee, Second-generation PLINK: Rising to the challenge of larger and richer datasets. *Gigascience* **4**, 7 (2015).
77. C. Kern, Functional annotations of three domestic animal genomes provide vital resources for comparative and agricultural research (2021); <https://github.com/kernco/functional-annotation>, <https://doi.org/10.5281/zenodo.4540293>.
78. Z. Pan, Pig genome functional annotation enhances the biological interpretation of complex traits and human disease (2021); <https://github.com/zhypan/Functional-Annotation-of-Pig>, <https://doi.org/10.5281/zenodo.5338812>.
79. Z. Pan, An atlas of regulatory elements in 23 chicken tissues informs complex trait variation and domestication selection (2022); [https://github.com/zhypan/FAANG\\_chicken](https://github.com/zhypan/FAANG_chicken), <https://doi.org/10.5281/zenodo.6609263>.

80. B. Dorshorst, R. Okimoto, C. Ashwell, Genomic regions associated with dermal hyperpigmentation, polydactyly and other morphological traits in the Silkie chicken. *J. Hered.* **101**, 339–350 (2010).
81. J. Li, M. O. Lee, J. Chen, B. W. Davis, B. J. Dorshorst, P. B. Siegel, M. Inaba, T. X. Jiang, C. M. Chuong, L. Andersson, *Cis*-acting mutation affecting *GJA5* transcription is underlying the *Melanotic* within-feather pigmentation pattern in chickens. *Proc. Natl. Acad. Sci. U.S.A.* **118**, e2109363118 (2021).
82. G. W. Zhang, Y. Liao, W. X. Zhang, Y. Wu, A. Liu, A new dominant haplotype of MC1R gene in Chinese black plumage chicken. *Anim. Genet.* **48**, 624 (2017).
83. J. Li, M.-O. Lee, B. W. Davis, P. Wu, S.-M. Hsieh Li, C.-M. Chuong, L. Andersson, The crest phenotype in domestic chicken is caused by a 197 bp duplication in the intron of *HOXC10*. *G3* **11**, jkaa048 (2021).
84. J. Li, M. O. Lee, B. W. Davis, S. Lamichhaney, B. J. Dorshorst, P. B. Siegel, L. Andersson, Mutations upstream of the *TBX5* and *PITX1* transcription factor genes are associated with feathered legs in the domestic chicken. *Mol. Biol. Evol.* **37**, 2477–2486 (2020).
85. C. Bortoluzzi, H. J. Megens, M. Bosse, M. F. L. Derks, B. Dibbits, K. Laport, S. Weigend, M. A. M. Groenen, R. P. M. A. Crooijmans, Parallel genetic origin of foot feathering in birds. *Mol. Biol. Evol.* **37**, 2465–2476 (2020).
